# Supplementary figures and images for: Macromolecular composition of terrestrial and marine organic matter in sediments across the East Siberian Arctic Shelf
Source: Copernicus journal article supplement (doi:10.5194/tc-2016-143), 2016-06-13

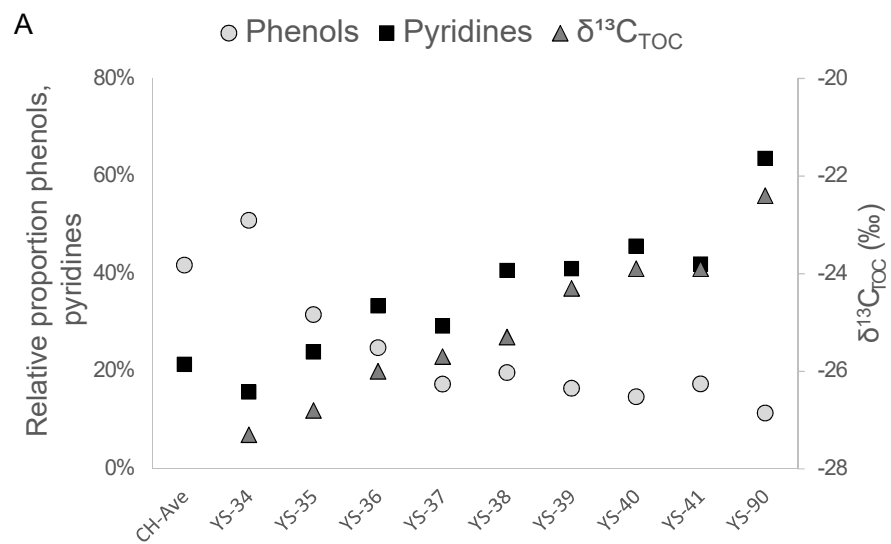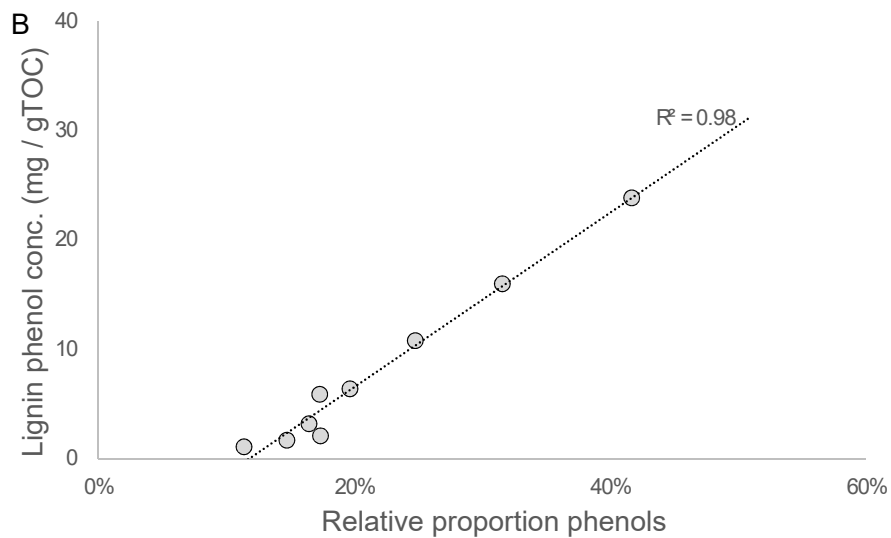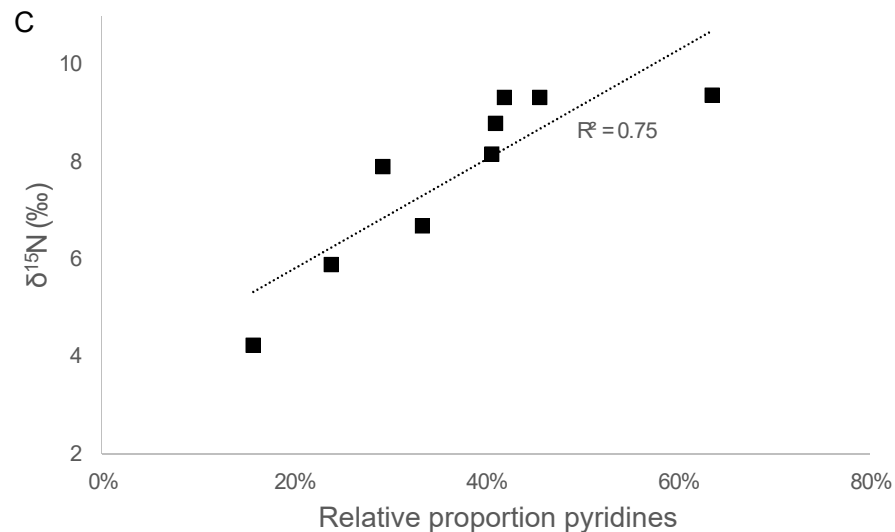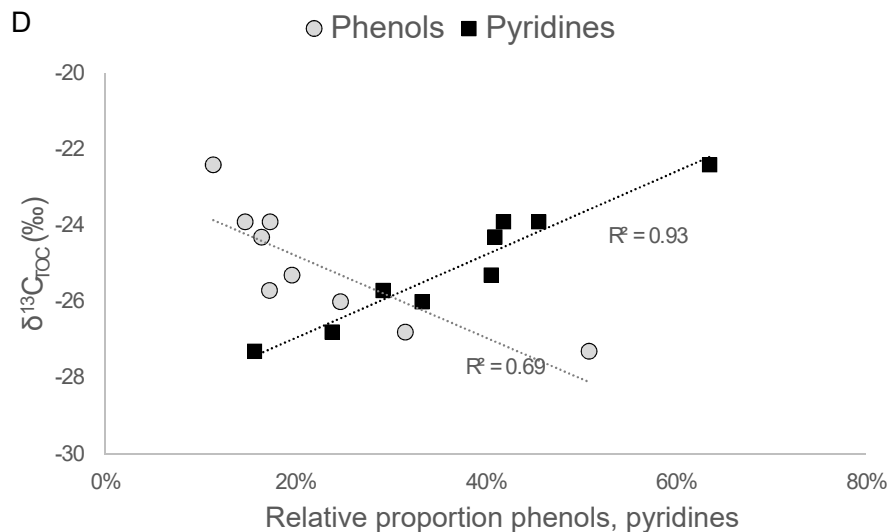

Supplement: Supplementary file 1 [file tc-2016-143-supplement.zip]

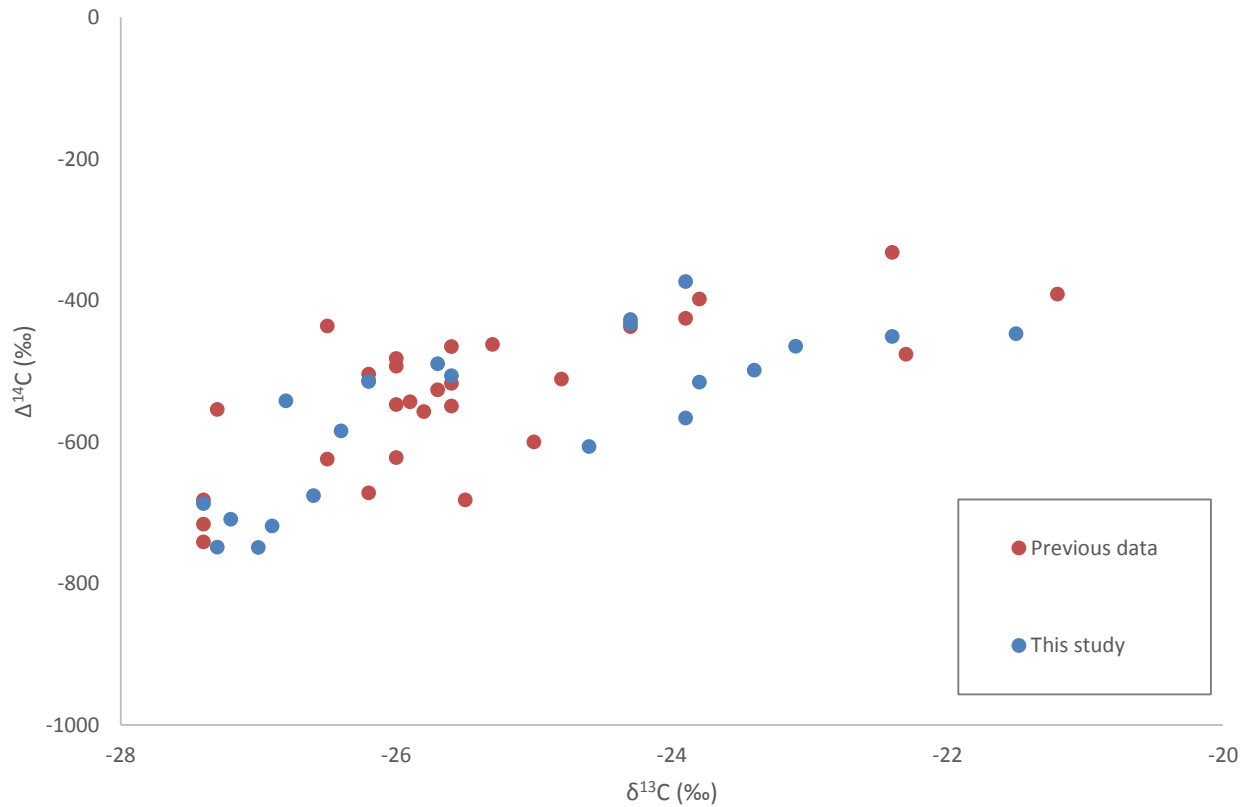

Supplement: Supplementary file 2 [file tc-2016-143-supplement.zip]
